# Supplementary material for: EIF4A3 serves as a prognostic and immunosuppressive microenvironment factor and inhibits cell apoptosis in bladder cancer
Source: PeerJ. 2023 May 8;11:e15309. doi: 10.7717/peerj.15309 (PMC10174062; doi:10.7717/peerj.15309)
Supplement: Data S1 — The clone number of 5637 and T24 cells [file peerj-11-15309-s003.xlsx]

## Sheet: Sheet1
	5637			T24
	Si-NC	Si-EIF4A3-1	Si-EIF4A3-2	Si-NC	Si-EIF4A3-1	Si-EIF4A3-2
Clone numbers	565	244	310	216	128	140
	542	291	301	259	121	132
	422	270	294	270	111	125
