# Supplementary material for: EIF4A3 serves as a prognostic and immunosuppressive microenvironment factor and inhibits cell apoptosis in bladder cancer
Source: PeerJ. 2023 May 8;11:e15309. doi: 10.7717/peerj.15309 (PMC10174062; doi:10.7717/peerj.15309)
Supplement: Data S2 — The OD values of 5637 and T24 after knocking down the EIF4A3 expression in different time points. [file peerj-11-15309-s005.xlsx]

## Sheet: Sheet1
5637
Time(h)	Si-NC(OD value)					Si-EIF4A3-1(OD value)					Si-EIF4A3-2(OD value)
24	0.3469	0.3554	0.3376	0.3511	0.3442	0.3771	0.3706	0.3585	0.3542	0.3669	0.384	0.3773	0.3758	0.3711	0.3591
48	0.4889	0.4576	0.4705	0.4554	0.4693	0.404	0.3924	0.4001	0.4023	0.4141	0.4061	0.3902	0.3772	0.3822	0.3819
72	0.9381	0.9652	0.928	0.9324	0.9544	0.4894	0.4777	0.4719	0.4924	0.4874	0.484	0.4981	0.4039	0.4851	0.3145
96	1.8922	1.7637	1.769	1.8158	1.7731	0.6885	0.6562	0.6722	0.6569	0.6344	0.5631	0.5983	0.5226	0.567	0.5712
T24
Time(h)	Si-NC(OD value)					Si-EIF4A3-1(OD value)					Si-EIF4A3-2(OD value)
24	0.3766	0.3776	0.3749	0.3921	0.376	0.3488	0.3575	0.366	0.3547	0.3699	0.4212	0.3803	0.3598	0.3997	0.4331
48	0.6826	0.6383	0.62	0.6259	0.6628	0.4722	0.455	0.4475	0.4521	0.464	0.4387	0.4105	0.4301	0.4339	0.3905
72	0.8883	0.8878	0.8754	0.8591	0.8619	0.4655	0.4564	0.4624	0.4548	0.4802	0.5229	0.5182	0.5061	0.4992	0.5133
96	1.3567	1.3838	1.3917	1.4103	1.3799	0.602	0.6095	0.5801	0.6326	0.6256	0.7259	0.771	0.7169	0.7862	0.7197
