# Supplementary material for: EIF4A3 serves as a prognostic and immunosuppressive microenvironment factor and inhibits cell apoptosis in bladder cancer
Source: PeerJ. 2023 May 8;11:e15309. doi: 10.7717/peerj.15309 (PMC10174062; doi:10.7717/peerj.15309)
Supplement: Supplemental Information 9 [file peerj-11-15309-s009.xlsx]

## Sheet: Sheet 1
ID	Description	setSize	enrichmentScore	NES	pvalue	p.adjust	qvalues	rank	leading_edge	core_enrichment
HALLMARK_HEDGEHOG_SIGNALING	HALLMARK_HEDGEHOG_SIGNALING	36	0.489967	1.98555	0.00684932	0.0925926	0.0643275	3381	tags=31%, list=9%, signal=28%	L1CAM/CDK5R1/NKX6-1/NRCAM/AMOT/CDK6/SCG2/CNTFR/NRP1/HEY1/CELSR1
HALLMARK_PANCREAS_BETA_CELLS	HALLMARK_PANCREAS_BETA_CELLS	40	0.514521	2.12209	0.00689655	0.0925926	0.0643275	1339	tags=30%, list=4%, signal=29%	INSM1/NKX2-2/NEUROD1/GCG/ISL1/SYT13/PAX6/DPP4/NKX6-1/NEUROG3/DCX/STXBP1
HALLMARK_WNT_BETA_CATENIN_SIGNALING	HALLMARK_WNT_BETA_CATENIN_SIGNALING	42	0.460368	1.90262	0.00746269	0.0925926	0.0643275	6899	tags=43%, list=19%, signal=35%	DLL1/MYC/WNT6/WNT5B/DVL2/TCF7/SKP2/HEY1/ADAM17/JAG1/JAG2/DKK1/CTNNB1/HDAC2/HDAC5/LEF1/NCSTN/CUL1
HALLMARK_REACTIVE_OXYGEN_SPECIES_PATHWAY	HALLMARK_REACTIVE_OXYGEN_SPECIES_PATHWAY	49	0.377342	1.58019	0.00925926	0.0925926	0.0643275	7986	tags=41%, list=22%, signal=32%	PFKP/TXNRD1/G6PD/GCLM/PRNP/MPO/PRDX4/SRXN1/PRDX1/ABCC1/PRDX6/SOD2/TXN/CDKN2D/GLRX2/FTL/OXSR1/PTPA/SBNO2/SCAF4
HALLMARK_MYC_TARGETS_V2	HALLMARK_MYC_TARGETS_V2	58	0.607568	2.69271	0.0105263	0.0925926	0.0643275	7988	tags=62%, list=22%, signal=49%	PLK1/MYC/MCM4/CDK4/PLK4/MCM5/RCL1/NOLC1/AIMP2/NIP7/DCTPP1/DDX18/HSPD1/WDR43/UTP20/BYSL/UNG/NOP56/PRMT3/PES1/RABEPK/NPM1/SLC19A1/MRTO4/PHB/RRP12/GRWD1/CBX3/TFB2M/TCOF1/PPRC1/FARSA/LAS1L/WDR74/MAP3K6/HK2
HALLMARK_ANGIOGENESIS	HALLMARK_ANGIOGENESIS	36	0.425489	1.72426	0.0136986	0.0925926	0.0643275	4797	tags=36%, list=13%, signal=31%	OLR1/CXCL6/THBD/PF4/LPL/SPP1/NRP1/JAG1/JAG2/SERPINA5/FSTL1/APP/VAV2
HALLMARK_CHOLESTEROL_HOMEOSTASIS	HALLMARK_CHOLESTEROL_HOMEOSTASIS	74	0.423836	1.98728	0.0140845	0.0925926	0.0643275	5372	tags=43%, list=15%, signal=37%	FADS2/PLAUR/ANXA5/LPL/IDI1/TNFRSF12A/CYP51A1/FDPS/ACAT2/NFIL3/ALCAM/TRIB3/ERRFI1/CXCL16/ATF3/CBS/JAG1/LSS/FASN/GPX8/NSDHL/LDLR/SCD/PLSCR1/HMGCS1/STX5/SQLE/HMGCR/PDK3/STARD4/CTNNB1/DHCR7
HALLMARK_APICAL_SURFACE	HALLMARK_APICAL_SURFACE	44	0.388791	1.61865	0.0153846	0.0925926	0.0643275	3860	tags=39%, list=11%, signal=35%	PCSK9/DCBLD2/ATP6V0A4/SULF2/RTN4RL1/MDGA1/PLAUR/RHCG/BRCA1/GAS1/AFAP1L2/LYN/NTNG1/EPHB4/IL2RB/SRPX/ADIPOR2
HALLMARK_IL6_JAK_STAT3_SIGNALING	HALLMARK_IL6_JAK_STAT3_SIGNALING	87	0.468779	2.16724	0.0178571	0.0925926	0.0643275	4665	tags=37%, list=13%, signal=32%	CSF2/CCL7/IL1R2/CXCL11/CXCL3/CD44/CNTFR/OSMR/TNF/CXCL9/STAT1/PF4/CXCL10/SOCS1/TNFRSF12A/IL2RA/CSF1/ITGA4/TLR2/IL15RA/CD14/IL1B/IL13RA1/PTPN1/JUN/IL12RB1/SOCS3/FAS/IRF1/PTPN2/GRB2/CSF2RA
HALLMARK_INTERFERON_ALPHA_RESPONSE	HALLMARK_INTERFERON_ALPHA_RESPONSE	97	0.550677	2.66997	0.0212766	0.0925926	0.0643275	7958	tags=59%, list=22%, signal=46%	CXCL11/USP18/IFITM1/DDX60/MX1/TAP1/CD47/IFIH1/SAMD9/CXCL10/BATF2/IFIT2/IFI44/IFI44L/EPSTI1/CSF1/HELZ2/UBE2L6/IFIT3/IFITM3/WARS1/CMPK2/EIF2AK2/HERC6/GMPR/LY6E/LAP3/PLSCR1/PSMB9/IL15/ADAR/PNPT1/GBP4/NMI/LAMP3/PARP9/IRF1/RSAD2/TENT5A/IRF7/SAMD9L/NCOA7/TDRD7/PARP12/IFI35/HLA-C/CNP/CMTR1/RNF31/OASL/TRIM14/TRIM21/C1S/IFI27/ISG20/B2M/PARP14
HALLMARK_PROTEIN_SECRETION	HALLMARK_PROTEIN_SECRETION	96	0.420306	2.00152	0.0217391	0.0925926	0.0643275	7900	tags=43%, list=22%, signal=34%	EGFR/CAV2/SCRN1/ANP32E/CTSC/BNIP3/ZW10/LAMP2/ATP1A1/M6PR/YKT6/PAM/KIF1B/LMAN1/CLTC/AP2B1/TMX1/VAMP7/IGF2R/PPT1/ARFGAP3/AP3S1/COPB1/SEC24D/COPB2/SCAMP3/SNX2/RAB14/VAMP3/ARCN1/TMED2/TSG101/TOM1L1/STAM/MAPK1/AP3B1/SEC22B/VPS4B/GOSR2/ATP6V1H/RAB22A
HALLMARK_ANDROGEN_RESPONSE	HALLMARK_ANDROGEN_RESPONSE	100	0.335025	1.63871	0.0222222	0.0925926	0.0643275	5887	tags=36%, list=16%, signal=30%	BMPR1B/CDK6/PMEPA1/FADS1/SMS/ELOVL5/FKBP5/NDRG1/UAP1/IDI1/SGK1/HOMER2/CENPN/ANKH/NKX3-1/H1-0/DHCR24/STEAP4/GNAI3/HERC3/AKAP12/LMAN1/VAPA/SCD/HMGCS1/ACTN1/SAT1/HMGCR/ALDH1A3/ELL2/PGM3/MYL12A/INSIG1/CCND3/RRP12/SEC24D
HALLMARK_PI3K_AKT_MTOR_SIGNALING	HALLMARK_PI3K_AKT_MTOR_SIGNALING	105	0.364149	1.77506	0.0285714	0.10989	0.0763447	9310	tags=48%, list=26%, signal=36%	EGFR/NGF/E2F1/CDK4/CDK1/CAMK4/PRKAA2/SLC2A1/SFN/TRIB3/CDK2/RALB/CLTC/GRB2/NCK1/YWHAB/MAP2K6/ATF1/RPTOR/PTPN11/HSP90B1/TRAF2/FASLG/CDKN1B/EIF4E/CAB39/MAPKAP1/ARHGDIA/ACACA/ACTR3/ACTR2/MAPK1/SLA/DUSP3/PPP2R1B/PDK1/CALR/UBE2D3/RPS6KA1/PRKAR2A/MAPK8/PPP1CA/PFN1/PRKAG1/CFL1/GSK3B/PAK4/MAP3K7/TNFRSF1A/CDKN1A
HALLMARK_UNFOLDED_PROTEIN_RESPONSE	HALLMARK_UNFOLDED_PROTEIN_RESPONSE	111	0.545099	2.67584	0.0322581	0.110865	0.0770218	8816	tags=59%, list=24%, signal=45%	IGFBP1/TUBB2A/MTHFD2/SLC7A5/CKS1B/TARS1/PDIA6/IARS1/SLC1A4/DKC1/EIF2S1/HYOU1/EXOSC2/PSAT1/PAIP1/IFIT1/NOLC1/GEMIN4/ATF3/DDX10/XPOT/HSPA5/STC2/SHC1/DCTN1/EIF4G1/KDELR3/SDAD1/EXOSC9/BAG3/SSR1/NOP56/CEBPB/EXOSC10/ATF6/H2AX/HSP90B1/NPM1/EDC4/EDEM1/PDIA5/EIF4E/EXOC2/POP4/PREB/DDIT4/ATP6V0D1/NOP14/KHSRP/FKBP14/LSM1/CALR/GOSR2/WIPI1/FUS/TTC37/MTREX/ALDH18A1/NABP1/SRPRB/KIF5B/CEBPG/CHAC1/SLC30A5/YWHAZ
HALLMARK_SPERMATOGENESIS	HALLMARK_SPERMATOGENESIS	134	0.37987	1.88183	0.04	0.110865	0.0770218	4427	tags=35%, list=12%, signal=31%	DMRT1/CNIH2/NPY5R/ART3/THEG/YBX2/CCNA1/CDKN3/NEK2/KIF2C/NCAPH/CST8/TKTL1/AURKA/HSPA4L/CCNB2/GFI1/POMC/SCG3/RFC4/BUB1/TTK/IL12RB2/CDK1/MLF1/EZH2/SYCP1/PSMG1/CAMK4/DMC1/CLGN/RPL39L/TOPBP1/ARL4A/DBF4/CHRM4/PARP2/SLC12A2/MTNR1A/MAST2/TSN/ELOVL3/PDHA2/AGFG1/TEKT2/STRBP/H1-6
HALLMARK_TGF_BETA_SIGNALING	HALLMARK_TGF_BETA_SIGNALING	54	0.349411	1.47939	0.040404	0.110865	0.0770218	6109	tags=30%, list=17%, signal=25%	NOG/SERPINE1/PMEPA1/KLF10/BCAR3/LTBP2/SMAD1/SMURF2/RAB31/CDKN1C/TGFBR1/HIPK2/CTNNB1/TGFB1/SPTBN1/RHOA
HALLMARK_COAGULATION	HALLMARK_COAGULATION	138	0.275427	1.35224	0.047619	0.110865	0.0770218	2867	tags=19%, list=8%, signal=17%	KLK8/SERPINB2/F3/CTSV/MMP3/OLR1/SERPINA1/MMP10/ANXA1/DPP4/TFPI2/MMP8/THBD/SERPINE1/MMP1/PLAU/FN1/HPN/ITGA2/PF4/DUSP14/MMP7/LAMP2/ADAM9/CAPN2/DCT
HALLMARK_UV_RESPONSE_DN	HALLMARK_UV_RESPONSE_DN	144	0.370584	1.85234	0.05	0.110865	0.0770218	6156	tags=34%, list=17%, signal=28%	F3/EFEMP1/CAV1/MYC/SERPINE1/SLC7A1/HAS2/MET/SNAI2/MT1E/GCNT1/ANXA2/ADGRL2/CDON/ADORA2B/GJA1/RGS4/MGLL/NRP1/NR3C1/MMP16/PIK3CD/BHLHE40/LTBP1/RND3/AKT3/PIAS3/COL11A1/TENT4A/LDLR/CAP2/NOTCH2/ABCC1/BDNF/SCN8A/VAV2/ATRN/FYN/IGF1R/DAB2/INSIG1/PHF3/KIT/CITED2/MAPK14/NEK7/CDKN1B/ATP2C1/NFKB1
HALLMARK_DNA_REPAIR	HALLMARK_DNA_REPAIR	149	0.428898	2.16906	0.0526316	0.110865	0.0770218	7733	tags=44%, list=21%, signal=35%	CDA/TYMS/PRIM1/ZWINT/RFC4/PCNA/FEN1/POLA1/RFC3/ADA/SSRP1/ALYREF/CANT1/RAD51/HPRT1/PNP/RALA/POLD1/RPA3/POLD3/GTF2H3/SF3A3/RFC2/PDE6G/NELFB/POLA2/CMPK2/AK1/RNMT/RFC5/RPA2/BRF2/CLP1/TAF13/TAF6/NUDT21/POLR2D/DDB1/GTF3C5/RAE1/UPF3B/TAF12/POLR3C/POLH/ERCC4/GTF2H1/SAC3D1/POLR2A/ELOA/SUPT4H1/POLR2G/NELFE/UMPS/TMED2/TSG101/TAF9/CETN2/ERCC3/AK3/LIG1/SDCBP/GSDME/EIF1B/USP11/POM121/POLE4
HALLMARK_UV_RESPONSE_UP	HALLMARK_UV_RESPONSE_UP	158	0.454305	2.26551	0.0555556	0.110865	0.0770218	6311	tags=39%, list=17%, signal=32%	COL2A1/GAL/RRAD/CTSV/NKX2-5/TCHH/CDKN2B/LHX2/SHOX2/ICAM1/MAPK8IP2/RFC4/TARS1/FEN1/CCNE1/ONECUT1/BTG3/PPAT/TUBA4A/TAP1/DDX21/GGH/HSPA13/POLE3/ENO2/LYN/DNAJA1/ARRB2/CDK2/NUP58/ATF3/STIP1/AMD1/TFRC/CA2/PARP2/CDKN1C/YKT6/SIGMAR1/CDC5L/TYRO3/DNAJB1/IRF1/PPT1/HNRNPU/MMP14/EPCAM/SOD2/RPN1/H2AX/PSMC3/OLFM1/EIF2S3/CCND3/CHRNA5/FKBP4/CNP/AGO2/BCL2L11/FOSB/PRPF3
HALLMARK_APOPTOSIS	HALLMARK_APOPTOSIS	161	0.412918	2.0298	0.0588235	0.110865	0.0770218	7401	tags=48%, list=20%, signal=39%	EREG/CAV1/CDC25B/ANXA1/CCNA1/TOP2A/CD44/PMAIP1/TGFB2/HMGB2/EMP1/TNF/PRF1/BRCA1/DPYD/BTG3/TAP1/IER3/IFNB1/TNFRSF12A/ENO2/FEZ1/TNFSF10/IGFBP6/CTH/ANKH/DNAJA1/BIK/H1-0/CDK2/IFITM3/ATF3/NEDD9/CD14/IL1B/PLAT/EGR3/JUN/FAS/IRF1/BIRC3/IGF2R/PPT1/SAT1/APP/MCL1/SOD2/LMNA/CTNNB1/DIABLO/WEE1/ETF1/IL1A/FASLG/IL18/ROCK1/VDAC2/CDKN1B/SPTAN1/DAP/BCL2L11/RETSAT/CD38/IFNGR1/LEF1/PPP2R5B/CASP2/EBP/PPP3R1/GADD45A/BC…
HALLMARK_APICAL_JUNCTION	HALLMARK_APICAL_JUNCTION	199	0.415581	2.22202	0.0833333	0.110865	0.0770218	5025	tags=32%, list=14%, signal=27%	DSC1/CLDN6/CDSN/EGFR/KRT31/ICAM5/PPP2R2C/LAMC2/TGFBI/LAMA3/CD274/SLC30A3/CLDN9/COL17A1/ICAM1/CALB2/ADAM23/CDH3/MYH10/DSC3/CLDN14/AMH/BAIAP2/ITGA2/MSN/LAYN/FSCN1/SIRPA/ACTN2/ATP1A3/CADM2/GRB7/ADAM9/WNK4/ITGA3/TUBG1/ITGB1/ITGB4/CDH15/IKBKG/FYB1/TSPAN4/LDLRAP1/CERCAM/CD99/NLGN2/SHC1/AKT3/SGCE/YWHAH/NRTN/NRAP/TRO/BMP1/LIMA1/RASA1/EPB41L2/ACTN1/LAMB3/VAV2/PIK3CB/ACTN4/CD86
HALLMARK_ESTROGEN_RESPONSE_EARLY	HALLMARK_ESTROGEN_RESPONSE_EARLY	199	0.397507	2.12539	0.0833333	0.110865	0.0770218	6395	tags=40%, list=18%, signal=33%	TUBB2B/KLK10/SYT12/CYP26B1/AREG/TMPRSS3/SLC16A1/RHOD/PLAAT3/MYB/MYC/CALB2/SEC14L2/SULT2B1/CD44/OPN3/KLF4/SLC7A5/PMAIP1/MICB/CELSR2/PDZK1/SLC9A3R1/ELOVL5/KLF10/NAV2/FKBP5/MYBL1/RBBP8/INHBB/CANT1/TFAP2C/SLC2A1/SLC1A4/TGM2/TPD52L1/GJA1/ENDOD1/SFN/SCARB1/TIPARP/THSD4/CELSR1/TPBG/RAB31/STC2/BHLHE40/FASN/SNX24/ZNF185/LRIG1/SLC1A1/PAPSS2/EGR3/BLVRB/KAZN/BCL11B/ISG20L2/SOX3/IGF1R/TMEM164/MED24/DHCR7/GREB…
HALLMARK_ESTROGEN_RESPONSE_LATE	HALLMARK_ESTROGEN_RESPONSE_LATE	199	0.454773	2.43157	0.0833333	0.110865	0.0770218	3580	tags=29%, list=10%, signal=26%	KLK10/KLK11/ASCL1/GAL/CYP26B1/AREG/LAMC2/TMPRSS3/SLC16A1/SERPINA1/PRLR/CAV1/CCNA1/NMU/TFPI2/PLAAT3/MYB/CDC20/SULT2B1/IMPA2/TOP2A/HSPA4L/ASS1/CD44/OPN3/KLF4/SLC7A5/STIL/MICB/CELSR2/PDZK1/SLC9A3R1/KIF20A/ELOVL5/CDC6/FKBP5/MEST/BTG3/PLK4/RBBP8/PERP/TFAP2C/SLC1A4/SGK1/GINS2/TPD52L1/HPRT1/HOMER2/SFN/SNX10/SCARB1/RNASEH2A/GJB3/ST6GALNAC2/TPBG/RAB31/ALDH3A2/CA2
HALLMARK_GLYCOLYSIS	HALLMARK_GLYCOLYSIS	199	0.47541	2.54191	0.0833333	0.110865	0.0770218	7988	tags=55%, list=22%, signal=43%	EGFR/LHX9/NT5E/CLDN3/TGFBI/CLDN9/DEPDC1/DSC2/CENPA/SOX9/TKTL1/AURKA/HMMR/CD44/SLC16A3/STMN1/TGFA/MET/PFKP/G6PD/LDHA/ENO1/AK4/PGK1/KIF20A/PC/GPC4/CDK1/PLOD2/GAL3ST1/ME1/KIF2A/IER3/P4HA2/ADORA2B/PRPS1/ENO2/PGAM1/CTH/BIK/PKP2/ANGPTL4/NASP/CHST4/SAP30/PLOD1/GNE/NDST3/NANP/TPBG/TPI1/GPR87/EXT1/HSPA5/STC2/PAM/NSDHL/PYGL/EFNA3/EXT2/IL13RA1/GLCE/KDELR3/PYGB/RRAGD/PMM2/MED24/TXN/PDK3/TPST1/CHST6/CITED2/HS…
HALLMARK_HEME_METABOLISM	HALLMARK_HEME_METABOLISM	199	0.294125	1.57262	0.0833333	0.110865	0.0770218	6708	tags=39%, list=18%, signal=32%	ADD2/SLC7A11/ANK1/NFE2/E2F2/SNCA/TMCC2/HBQ1/TSPAN5/PC/MBOAT2/GCLM/GMPS/P4HA2/RHCE/SLC2A1/LAMP2/HDGF/SMOX/LPIN2/ENDOD1/H1-0/FECH/RCL1/OPTN/NR3C1/ABCG2/MPP1/PDZK1IP1/UBAC1/CTSB/OSBP2/BPGM/MFHAS1/SLC30A1/TFRC/CA2/HTRA2/SPTB/TYR/SLC6A9/CDC27/TOP1/ARL2BP/BLVRB/AGPAT4/DCAF10/HTATIP2/FOXJ2/ELL2/BMP2K/SLC10A3/BACH1/SLC22A4/SEC14L1/NFE2L1/XK/CCND3/SLC66A2/ISCA1/CTNS/ACSL6/NNT/NEK7/IGSF3/TRIM58/MARCHF8/HMB…
HALLMARK_HYPOXIA	HALLMARK_HYPOXIA	199	0.480074	2.56685	0.0833333	0.110865	0.0770218	6319	tags=45%, list=17%, signal=38%	B4GALNT2/EGFR/F3/TGFBI/PKP1/CAV1/IGFBP1/NCAN/MT2A/TMEM45A/SULT2B1/SERPINE1/TKTL1/PCK1/HOXB9/PFKP/SLC2A3/LDHA/ENO1/AK4/PGK1/PLAUR/MT1E/GPC4/CP/NDRG1/PGM1/ANXA2/IER3/P4HA2/NOCT/SLC2A1/ADORA2B/LOX/ENO2/TGM2/PLIN2/PLAC8/ADM/ANGPTL4/NFIL3/PFKFB3/SCARB1/TIPARP/ERRFI1/SAP30/CAVIN1/NR3C1/ATF3/GAA/TPBG/TPI1/KLF6/EXT1/AKAP12/CDKN1C/GRHPR/HSPA5/STC2/SRPX/BHLHE40/PAM/CSRP2/EFNA3/JMJD6/KLF7/KDELR3/GBE1/JUN/GC…
HALLMARK_INFLAMMATORY_RESPONSE	HALLMARK_INFLAMMATORY_RESPONSE	199	0.534355	2.85708	0.0833333	0.110865	0.0770218	6435	tags=49%, list=18%, signal=40%	EREG/F3/CD70/DCBLD2/OLR1/CCL7/ROS1/TNFSF9/CXCL11/ICAM1/CXCL6/MYC/SPHK1/INHBA/SERPINE1/SLC7A1/AXL/SLC31A2/HAS2/MEFV/MET/RNF144B/OSMR/IL7R/PLAUR/PDPN/OPRK1/CXCL9/IFITM1/NOD2/CLEC5A/HPN/SGMS2/SLC28A2/MXD1/CXCL10/ADORA2B/CCL20/ITGB8/LYN/TNFSF10/EMP3/FPR1/ADM/TNFRSF9/HIF1A/P2RX7/CD82/CD55/CSF1/TNFAIP6/GNAI3/EDN1/NAMPT/TPBG/NLRP3/KLF6/IL2RB/PCDH7/EIF2AK2/TLR2/KIF1B/IL15RA/CD14/IL1B/LY6E/HRH1/C5AR1/CXCL…
HALLMARK_KRAS_SIGNALING_DN	HALLMARK_KRAS_SIGNALING_DN	199	0.435284	2.32737	0.0833333	0.110865	0.0770218	3050	tags=32%, list=8%, signal=30%	KLK7/KLK8/KRT1/AMBN/TENM2/COL2A1/CALML5/TEX15/SERPINB2/CPB1/LGALS7/HTR1D/BMPR1B/TGM1/CDH16/WNT16/SLC6A14/PKP1/GRID2/SLC30A3/YBX2/FGF16/KRT4/AKR1B10/KCNQ2/CCNA1/ALOX12B/SHOX2/KRT5/CPA2/EDAR/NPY4R/DLK2/NGB/TCF7L1/SLC38A3/RYR1/CD207/CKM/MEFV/CELSR2/TGFB2/RIBC2/CNTFR/GPR19/CLDN16/SPTBN2/NUDT11/SNCB/SPRR3/SERPINA10/MX1/SLC5A5/SLC12A3/CLPS/CALCB/CD80/SGK1/SSTR4/CDKAL1/BARD1/PAX3/KCNN1/IFI44L
HALLMARK_MITOTIC_SPINDLE	HALLMARK_MITOTIC_SPINDLE	199	0.595694	3.18505	0.0833333	0.110865	0.0770218	7064	tags=52%, list=19%, signal=42%	TPX2/PLK1/ANLN/DLGAP5/KIF4A/FBXO5/NEK2/NDC80/KIF2C/ECT2/BIRC5/AURKA/TOP2A/NUSAP1/RACGAP1/PRC1/CCNB2/MYH10/CENPF/WASF1/KIF15/KIF23/LMNB1/INCENP/BUB1/CENPE/KIF11/TTK/CDK1/SMC1A/ESPL1/CEP72/TUBA4A/LLGL1/SMC4/FSCN1/CKAP5/KIF20B/TUBGCP3/SMC3/ARHGAP29/KIFAP3/TUBD1/RFC1/CCDC88A/FGD6/NET1/GEMIN4/KATNA1/NEDD9/RANBP9/CDK5RAP2/KIF1B/WASF2/MYO1E/PIF1/SASS6/TRIO/CDC42EP1/RASA1/NOTCH2/CDC27/EPB41L2/KIF3C/NCK1/…
HALLMARK_MTORC1_SIGNALING	HALLMARK_MTORC1_SIGNALING	199	0.614399	3.28506	0.0833333	0.110865	0.0770218	6928	tags=55%, list=19%, signal=45%	SLC7A11/MCM2/PLK1/POLR3G/FADS2/MCM4/AURKA/PSPH/MTHFD2/SLC7A5/TXNRD1/SLC2A3/G6PD/LDHA/ENO1/MLLT11/FADS1/BUB1/RRM2/AK4/PGK1/SLC9A3R1/ELOVL5/RPA1/SRD5A1/PLOD2/ME1/PGM1/PSMG1/PHGDH/TUBA4A/CCT6A/CTSC/IDI1/GMPS/CDC25A/SLC2A1/SLC1A4/DHFR/HPRT1/PNP/CTH/CYP51A1/NFIL3/NUP205/TRIB3/DHCR24/PSAT1/TUBG1/NAMPT/CACYBP/EPRS1/STIP1/M6PR/TPI1/WARS1/TFRC/CCNF/HSPA5/YKT6/BHLHE40/PSMD14/ADIPOR2/PRDX1/PSMD12/IFRD1/ACLY…
HALLMARK_P53_PATHWAY	HALLMARK_P53_PATHWAY	199	0.421438	2.25334	0.0833333	0.110865	0.0770218	6326	tags=35%, list=17%, signal=29%	KLK8/CDKN2A/RRAD/SLC7A11/CDK5R1/NHLH2/TCHH/CDKN2B/TNFSF9/PLK2/SPHK1/HSPA4L/KLF4/S100A10/TGFA/TM4SF1/PCNA/IRAK1/SERPINB5/NDRG1/BAIAP2/ADA/TAP1/INHBB/KRT17/IER3/PERP/MXD1/RNF19B/SOCS1/TPD52L1/RAD51C/SFN/OSGIN1/TRIB3/CD82/ZNF365/ITGB4/ATF3/PPM1D/CCP110/CCNK/AK1/RHBDF2/RAP2B/ELP1/SLC3A2/CDH13/JAG2/LIF/JUN/FAS/NINJ1/SAT1/APP/IER5/CLCA2/DNTTIP2/IL1A/TGFB1/AEN/CCND3/PLK3/POLH/VDR/PTPRE/HINT1/HBEGF/RETSA…
HALLMARK_ALLOGRAFT_REJECTION	HALLMARK_ALLOGRAFT_REJECTION	200	0.448817	2.34021	0.0909091	0.110865	0.0770218	6537	tags=39%, list=18%, signal=32%	KRT1/CDKN2A/EGFR/EREG/CCL7/IL11/ICAM1/CCL13/INHBA/PRKCG/DEGS1/IL12A/TGFB2/IL27RA/TNF/GCNT1/CXCL9/TLR6/PRF1/STAT1/BRCA1/PF4/TAP1/CD47/INHBB/CD80/SRGN/SOCS1/HDAC9/HLA-DOA/LYN/IL2RA/HIF1A/DYRK3/CSF1/TAP2/GZMA/FYB1/IFNG/NLRP3/WARS1/IL2RB/ABCE1/TLR2/IL1B/APBB1/LIF/IL15/IL12RB1/NCR1/FAS/NCK1/IRF7/EIF3A/CD86/EIF3J/HLA-DRA/CCL4/HLA-DMB/TRAF2/NPM1/FASLG/TGFB1/AARS1/IL10/IL18/BCAT1/TRAT1/CCND3/MRPL3/TLR1/J…
HALLMARK_COMPLEMENT	HALLMARK_COMPLEMENT	200	0.436132	2.27407	0.0909091	0.110865	0.0770218	5108	tags=34%, list=14%, signal=29%	CDA/SERPINB2/F3/CTSV/PCSK9/HPCAL4/CDK5R1/APOA4/OLR1/SERPINA1/DPP4/TFPI2/MMP8/SERPINE1/SCG3/L3MBTL4/PLAUR/FN1/CASP5/CP/MT3/ME1/ANXA5/MMP13/C1QC/CTSC/KIF2A/ACTN2/GNB4/LAMP2/LYN/USP14/MMP12/ADAM9/CD55/PDP1/GNAI3/GZMA/CTSL/CTSB/RCE1/CA2/HSPA5/C1QA/PLAT/LAP3/CDH13/PLSCR1/FCER1G/PSMB9/PCLO/CD59/EHD1/BRPF3/IRF1/GRB2/CEBPB/KYNU/ITGAM/IRF7/CR1/MMP14/FYN/LIPA/PHEX/C1R/TNFAIP3
HALLMARK_E2F_TARGETS	HALLMARK_E2F_TARGETS	200	0.79342	4.13703	0.0909091	0.110865	0.0770218	6049	tags=81%, list=17%, signal=68%	CDKN2A/TRIP13/MELK/CDC25B/MCM2/DIAPH3/PLK1/DLGAP5/DEK/DEPDC1/USP1/KIF4A/KPNA2/CDKN3/CDC20/MYC/CDCA8/MAD2L1/KIF2C/MCM4/RAD51AP1/BIRC5/AURKA/BUB1B/DNMT1/TCF19/TOP2A/MTHFD2/MCM6/RACGAP1/PSIP1/CCNB2/HMMR/CDKN2C/NCAPD2/ATAD2/MYBL2/STMN1/SPC25/KIF18B/DCLRE1B/GINS1/MKI67/MSH2/AURKB/DONSON/CDK4/HMGB2/LMNB1/CHEK1/CKS1B/RRM2/CENPE/TK1/PRKDC/PCNA/CKS2/CDK1/GINS4/UBE2T/RFC3/PTTG1/SPAG5/PSMC3IP/SMC1A/RPA1/CIT…
HALLMARK_EPITHELIAL_MESENCHYMAL_TRANSITION	HALLMARK_EPITHELIAL_MESENCHYMAL_TRANSITION	200	0.498559	2.59958	0.0909091	0.110865	0.0770218	5587	tags=46%, list=15%, signal=39%	PTHLH/APLP1/AREG/NT5E/MMP3/LAMC2/FOXC2/TGFBI/LAMA3/LAMA1/ANPEP/ECM1/TFPI2/FBN2/TNC/PTX3/CXCL6/CDH2/INHBA/SERPINE1/MMP1/VEGFC/CD44/SERPINE2/PMEPA1/SCG2/SNAI2/PLAUR/PCOLCE2/FN1/MFAP5/OXTR/BASP1/PLOD2/MEST/GAS1/ITGA2/SPP1/FAP/TNFRSF12A/LOX/ENO2/TGM2/EMP3/GJA1/RGS4/COLGALT1/SGCB/MCM7/ITGB1/PLOD1/CALU/FBLN2/PDLIM4/LRRC15/COL7A1/NNMT/GLIPR1/GPX7/IL32/COL11A1/LGALS1/PFN2/FSTL3/CXCL8/PVR/DKK1/CTHRC1/BMP1…
HALLMARK_G2M_CHECKPOINT	HALLMARK_G2M_CHECKPOINT	200	0.748193	3.90121	0.0909091	0.110865	0.0770218	6312	tags=72%, list=17%, signal=60%	CDC25B/TPX2/MCM2/PLK1/E2F2/KIF4A/KPNA2/CDKN3/FBXO5/NEK2/CCNA2/CDC20/MYC/MT2A/NDC80/MAD2L1/CENPA/KIF2C/SLC7A1/BIRC5/AURKA/RAD54L/TOP2A/NUSAP1/MCM6/RACGAP1/PRC1/SMC2/CCNB2/HMMR/CDKN2C/SLC7A5/MYBL2/STMN1/CENPF/STIL/TFDP1/E2F1/MKI67/KIF15/KIF23/HMGN2/AURKB/CDK4/PBK/LMNB1/CHEK1/INCENP/CKS1B/BUB1/CENPE/KIF11/TTK/FANCC/PRMT5/EXO1/CDC45/CDC7/CKS2/CDK1/CDC6/PTTG1/SMC1A/EZH2/HMGA1/ESPL1/PLK4/SMC4/ODC1/HSPA…
HALLMARK_INTERFERON_GAMMA_RESPONSE	HALLMARK_INTERFERON_GAMMA_RESPONSE	200	0.491407	2.56228	0.0909091	0.110865	0.0770218	7958	tags=53%, list=22%, signal=42%	CCL7/CD274/SECTM1/CXCL11/ICAM1/MT2A/MTHFD2/IDO1/PFKP/USP18/CXCL9/STAT1/DDX60/MX1/TAP1/GBP6/IFIH1/DDX58/CXCL10/SOCS1/PTGS2/OAS3/TNFSF10/FPR1/PNP/BATF2/HIF1A/IFIT2/IFI44/IFI44L/EPSTI1/IFIT1/HELZ2/TNFAIP6/UBE2L6/IFIT3/IFITM3/NAMPT/ARL4A/PSMB2/GZMA/WARS1/BPGM/IL2RB/CMPK2/EIF2AK2/HERC6/IL15RA/LY6E/LAP3/SAMHD1/HLA-B/PLSCR1/PSMB9/IL15/PTPN1/ADAR/PNPT1/GBP4/SOCS3/NMI/FAS/IRF1/PTPN2/RSAD2/IRF7/SAMD9L/TOR1…
HALLMARK_KRAS_SIGNALING_UP	HALLMARK_KRAS_SIGNALING_UP	200	0.365683	1.90674	0.0909091	0.110865	0.0770218	6245	tags=39%, list=17%, signal=33%	PPBP/EREG/CSF2/DCBLD2/WNT7A/PDCD1LG2/NGF/MMP10/EPHB2/GFPT2/G0S2/MALL/INHBA/SOX9/HOXD11/KLF4/SCG3/PLAU/HKDC1/IL7R/EMP1/ANO1/GABRA3/PLAUR/PIGR/TSPAN7/ITGA2/SPP1/CXCL10/PTGS2/CCL20/HDAC9/ANKH/ANGPTL4/NRP1/MMD/GPRC5B/ADAM17/YRDC/BPGM/CA2/AKAP12/PRKG2/RBP4/IL1B/PLAT/FBXO4/F2RL1/LCP1/FCER1G/MMP11/LIF/ETV5/F13A1/C3AR1/CSF2RA/BIRC3/IL1RL2/CPE/PLEK2/GALNT3/STRN/ALDH1A3/TNFAIP3/CIDEA/ETV4/TLR8/TMEM176B/ZNF…
HALLMARK_MYC_TARGETS_V1	HALLMARK_MYC_TARGETS_V1	200	0.620983	3.23791	0.0909091	0.110865	0.0770218	7568	tags=64%, list=21%, signal=51%	TYMS/MCM2/DEK/USP1/KPNA2/CCNA2/CDC20/MYC/MAD2L1/RRM1/MCM4/MCM6/CCT5/TFDP1/LDHA/RFC4/CDK4/PGK1/PCNA/CDC45/YWHAQ/CCT4/DDX21/ODC1/CAD/IARS1/POLE3/MCM5/UBA2/HPRT1/PSMA6/HDGF/H2AZ1/VBP1/EIF2S1/CSTF2/PRDX4/RAN/GLO1/HNRNPR/MCM7/ILF2/NOLC1/MRPL9/CDK2/POLD2/AIMP2/SET/PSMB2/EPRS1/CTPS1/SF3B3/SERBP1/XPOT/KPNB1/ABCE1/PSMD3/RAD23B/DDX18/NCBP1/LSM2/PSMD14/PTGES3/RANBP1/PSMD8/SF3A1/IFRD1/TCP1/PSMA7/PSMD1/EIF2S2…
HALLMARK_TNFA_SIGNALING_VIA_NFKB	HALLMARK_TNFA_SIGNALING_VIA_NFKB	200	0.594075	3.09761	0.0909091	0.110865	0.0770218	5108	tags=46%, list=14%, signal=40%	AREG/SERPINB2/F3/CSF2/OLR1/CLCF1/TNFSF9/CXCL11/TUBB2A/PLK2/GFPT2/TNC/CXCL3/PTX3/ICAM1/G0S2/CXCL6/MYC/SPHK1/INHBA/SERPINE1/FOSL1/CD44/KLF4/PMEPA1/PLAU/SLC2A3/IL7R/PLAUR/TNF/KLF10/CD83/BTG3/PANX1/TAP1/IFIH1/DDX58/IER3/CD80/MXD1/RNF19B/CXCL10/PHLDA1/PTGS2/CCL20/SGK1/FJX1/TNFRSF9/IFIT2/NFIL3/PFKFB3/TIPARP/CSF1/TNFAIP6/ATF3/EDN1/NAMPT/YRDC/RCAN1/KLF6/JAG1/PHLDA2/B4GALT5/BHLHE40/TLR2/IL15RA/IL1B/SERPIN…
HALLMARK_IL2_STAT5_SIGNALING	HALLMARK_IL2_STAT5_SIGNALING	198	0.390769	2.03276	0.1	0.119048	0.0827068	5993	tags=38%, list=16%, signal=32%	APLP1/NT5E/CSF2/COCH/IL1R2/ECM1/MYC/SLC39A8/CD44/SLC2A3/EMP1/CD83/TNFRSF18/ADAM19/CDC6/CDCP1/ITGA6/NDRG1/CCNE1/PRNP/ODC1/SPP1/MXD1/CXCL10/SOCS1/PHLDA1/TGM2/TNFSF10/PLIN2/IL2RA/PNP/TNFRSF9/BATF3/NFIL3/ALCAM/TNFRSF8/NRP1/UCK2/CSF1/IFITM3/ARL4A/KLF6/IL2RB/CA2/CDKN1C/BHLHE40/MYO1E/NCS1/PLAGL1/EOMES/ICOS/LRIG1/PLSCR1/LIF/GBP4/SLC1A5/PDCD2L/WLS/AHCY/IGF2R/RRAGD/CD86/HIPK2/IGF1R/CKAP4/LRRC8C/DRC1/ETV4/H…
HALLMARK_MYOGENESIS	HALLMARK_MYOGENESIS	199	-0.317663	-1.12073	0.218182	0.2537	0.176255	9580	tags=28%, list=26%, signal=21%	APLNR/TNNC1/MYL7/MYH3/CTF1/SGCD/GPX3/OCEL1/MYOM2/ACTN3/SOD3/SH2B1/SH3BGR/PICK1/SMTN/SPEG/MEF2C/IGF1/HSPB8/ERBB3/LARGE1/SPDEF/ITGA7/MYL4/MYH2/CSRP3/PTGIS/CKMT2/DTNA/TPM2/VIPR1/HRC/PPP1R3C/NCAM1/COX7A1/LSP1/MYH7/MYLPF/TNNT2/FHL1/LDB3/TAGLN/MYLK/MYOM1/CASQ1/SGCA/CACNA1H/TNNT3/SORBS1/TNNI2/PYGM/CASQ2/DES/MYH11/ACTC1/PVALB
