# Supplementary figures and images for: EIF4A3 serves as a prognostic and immunosuppressive microenvironment factor and inhibits cell apoptosis in bladder cancer
Source: PeerJ journal article supplement (doi:10.7717/peerj.15309), 2023-05-08

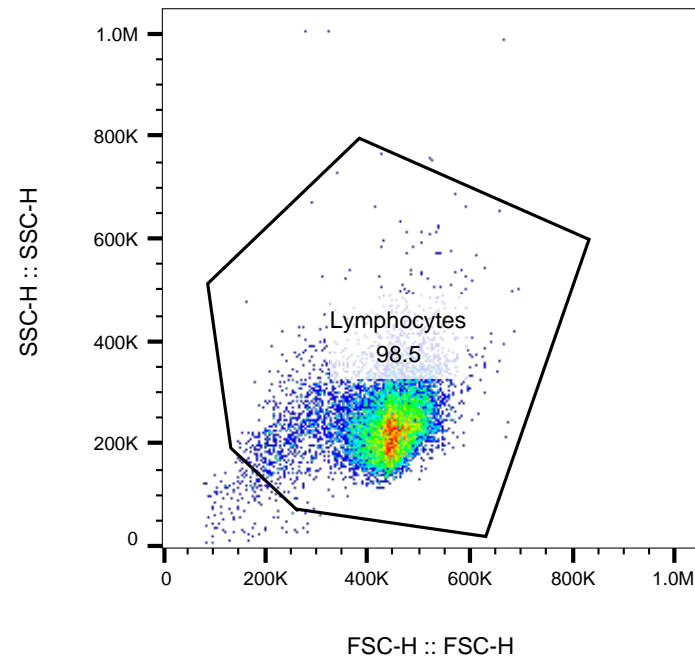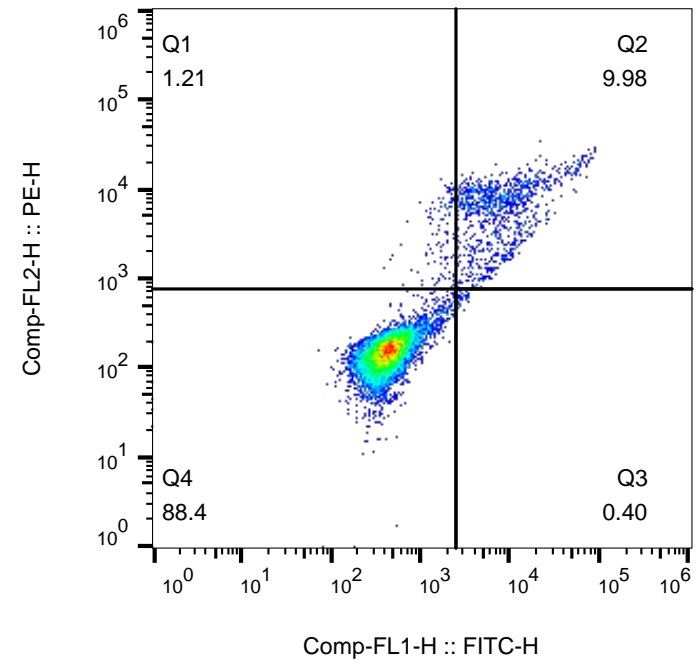

5637-Si-NC

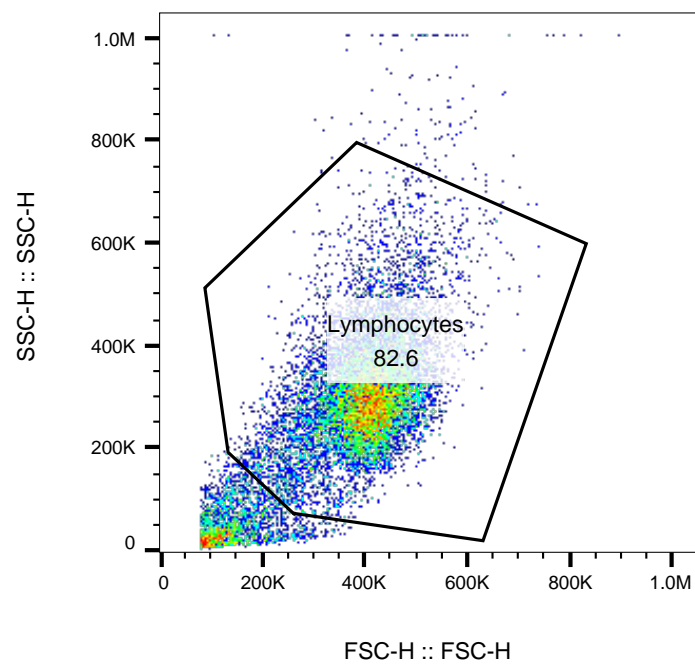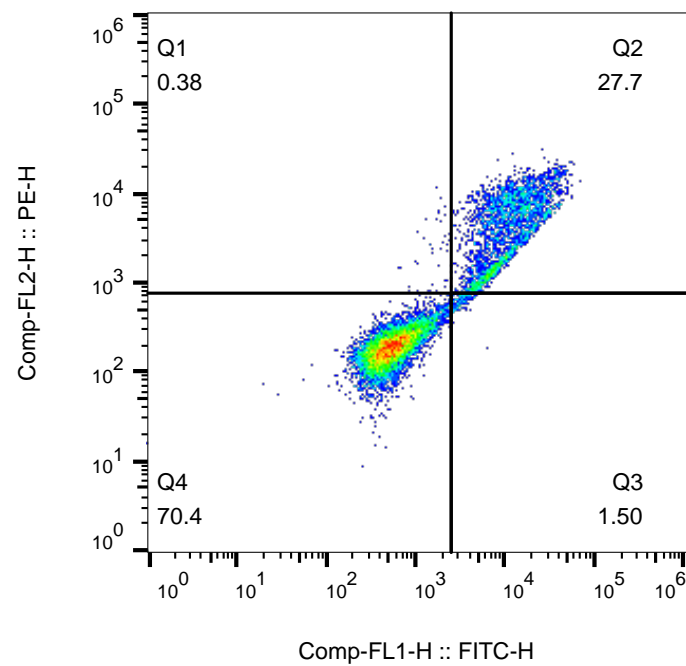

5637-Si-EIF4A3-1

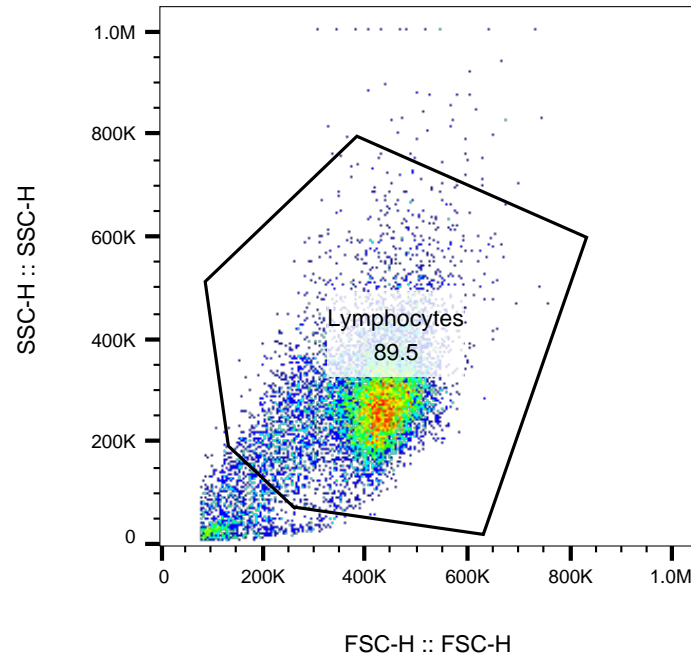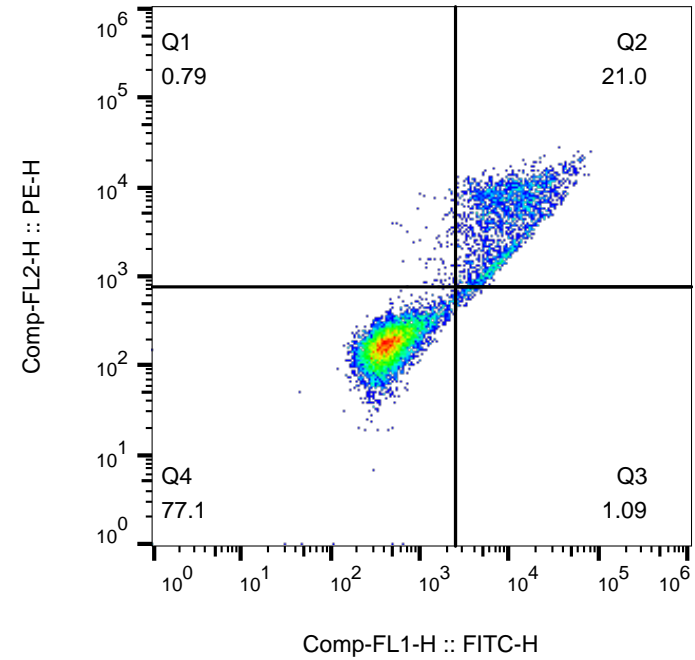

5637-Si-EIF4A3-2

Supplement: Apoptosis_original_data.7z [file Apoptosis_original_data.7z]

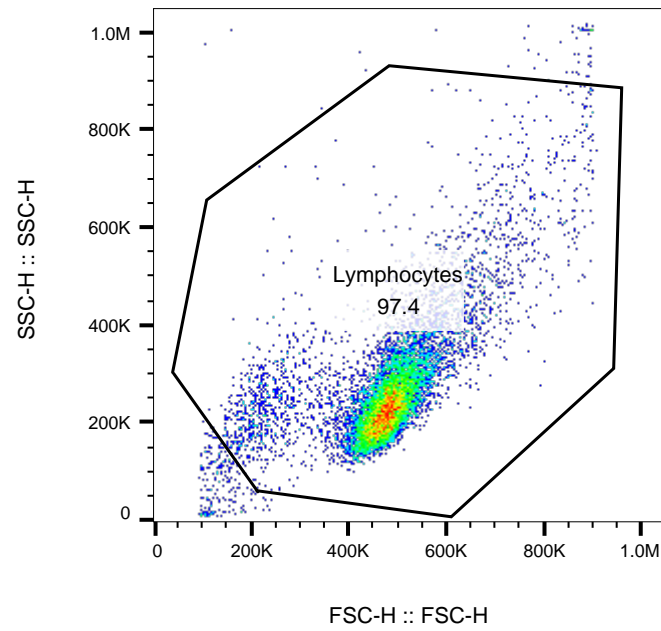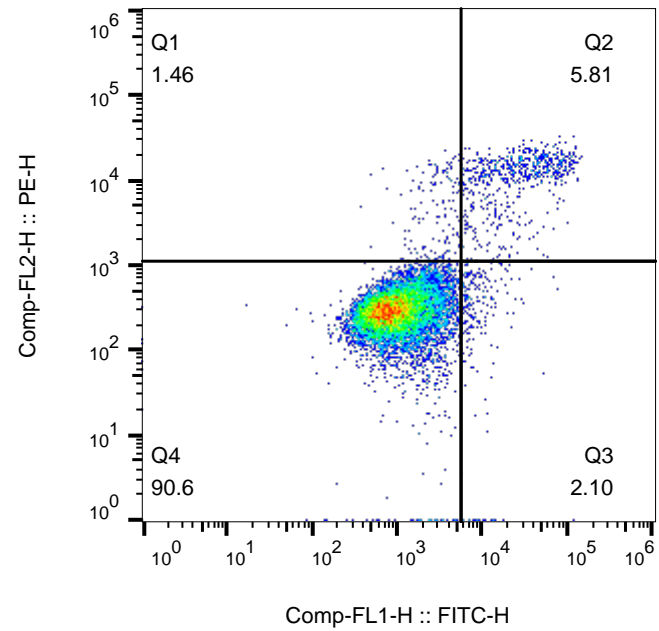

T24-Si-NC

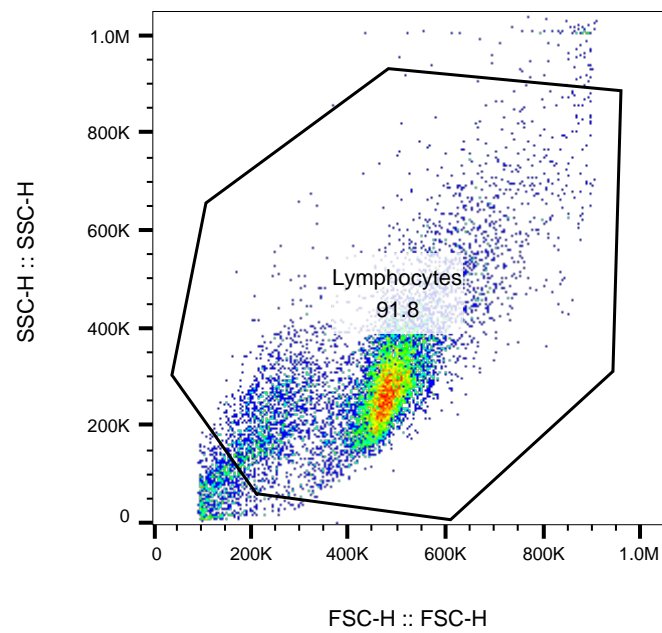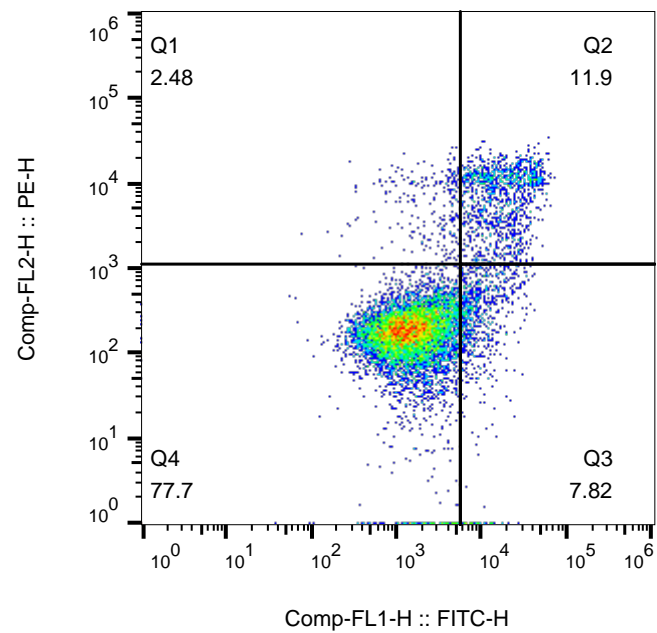

T24-Si-EIF4A3-1

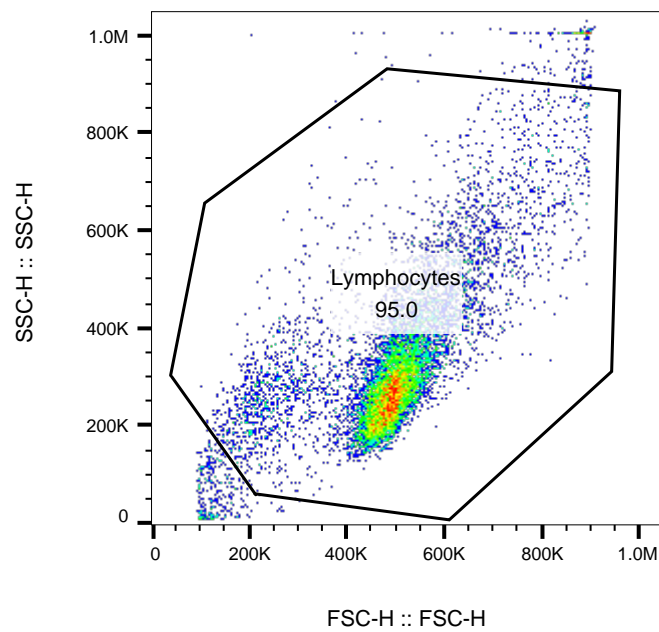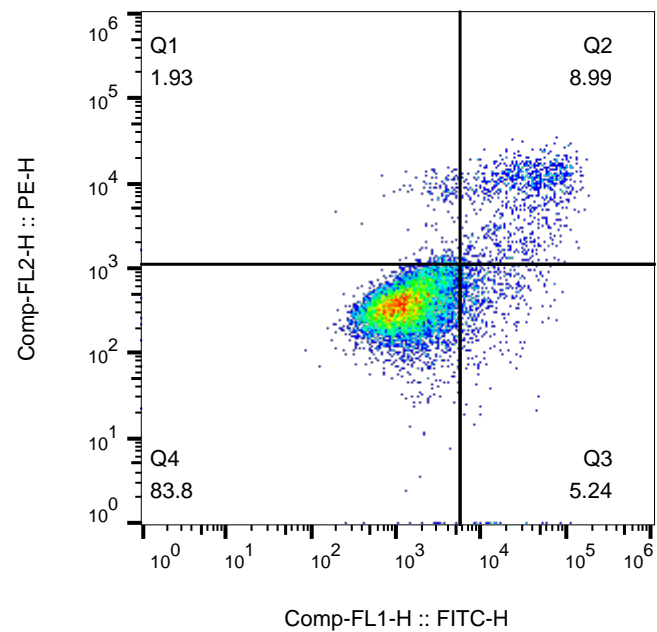

T24-Si-EIF4A3-2

Supplement: Apoptosis_original_data.7z [file Apoptosis_original_data.7z]
